# Supplementary material for: Coping with cancer pain: a qualitative study to explore pain perception and self-coping strategies of patients with cancer in Sri Lanka
Source: HighWire-hosted journal article supplement (doi:10.1136/bmjopen-2024-085510), 2024-11-01
Supplement: bmjopen-2024-085510supp001_data_supplement.pdf [file bmjopen-2024-085510supp001_data_supplement.pdf]

Supplementary Table 1: Demographic characteristics of the study participants (n=21)

| Demographic characteristics |                        | Frequency | Percentage % |
|-----------------------------|------------------------|-----------|--------------|
| Age (in years)              | 18-30                  | 2         | 9.5          |
|                             | 31-40                  | 3         | 14.3         |
|                             | 41-50                  | 5         | 23.8         |
|                             | 51-60                  | 7         | 33.3         |
|                             | 61-70                  | 4         | 19.0         |
| Ethnicity                   | Sinhala                | 18        | 85.7         |
|                             | Tamil                  | 2         | 9.5          |
|                             | Muslim                 | 1         | 4.8          |
| Religion                    | Buddhism               | 14        | 66.7         |
|                             | Catholic /Christianity | 4         | 19.0         |
|                             | Hindu                  | 2         | 9.5          |
|                             | Islam                  | 1         | 4.8          |
| Gender                      | Female                 | 12        | 57.1         |
|                             | Male                   | 9         | 42.9         |
| Current Marital status      | Married                | 16        | 76.2         |
|                             | Unmarried              | 2         | 9.5          |
|                             | Divorced/ separated    | 1         | 4.8          |
|                             | Widow                  | 2         | 9.5          |
| Highest level of education  | Not been to school     | 0         | 0            |
|                             | Grade 1-5              | 4         | 19.0         |
|                             | Grade 6-11             | 10        | 47.6         |
|                             | Grade 12-13            | 6         | 28.6         |

|                                |                   |    |      |
|--------------------------------|-------------------|----|------|
|                                | Graduate          | 1  | 4.8  |
|                                | Post graduate     | 0  | 0    |
| Monthly income (LKR)           | < 5,000           | 18 | 85.7 |
|                                | 5,001-10,000      | 0  | 0    |
|                                | 10,001-15,000     | 0  | 0    |
|                                | 15,001-20,000     | 0  | 0    |
|                                | >20,000           | 3  | 14.3 |
| Type of family                 | Nuclear           | 11 | 52.4 |
|                                | Extended          | 10 | 47.6 |
| Availability of helper         | Yes               | 15 | 71.4 |
|                                | No                | 6  | 28.6 |
| Family responsibilities        | Yes               | 13 | 61.9 |
|                                | No                | 8  | 38.1 |
| Time since diagnosis of cancer | < 1 year          | 11 | 52.4 |
|                                | > 1 year          | 10 | 47.6 |
| Type of Cancer                 | Uro-genital       | 4  | 19.0 |
|                                | Gastro-intestinal | 6  | 28.6 |
|                                | Breast            | 4  | 19.0 |
|                                | Other             | 5  | 23.8 |
|                                | Lung              | 2  | 9.5  |
| Duration of cancer pain        | 1-3 months        | 9  | 42.9 |
|                                | >3 months         | 12 | 57.1 |
| Presence of co-morbid diseases | Yes               | 6  | 28.6 |
|                                | No                | 15 | 71.4 |

Supplementary Table 2: Theme 1: Understanding pain

| Meaning units                                                                                                                 | Condensed Meaning units                                                                         | Codes                        | Categories                             | Themes             |
|-------------------------------------------------------------------------------------------------------------------------------|-------------------------------------------------------------------------------------------------|------------------------------|----------------------------------------|--------------------|
| <i>"This pain is the biggest problem I ever had."</i><br><i>"It is so hard ...not to let this kind of pain happen again."</i> | Persisting pain despite being on medications.<br>Episodes of pain experienced seem intolerable. | Pain is the biggest problem. | Physical and emotional impact          | Understanding pain |
| <i>"I am thinking is this a 'karma' which I had done in a previous birth."</i>                                                | People believe that the pain experienced as a result of doing in previous births/destinies.     | 'Karma' causes pain          | Cultural and spiritual interpretations |                    |
| <i>"The God is the one who gave me this pain."</i>                                                                            | This pain is given by god/ or super-natural power as a punishment                               | God-given the pain           |                                        |                    |

Supplementary Table 3: Theme 2- Coping strategies for living with pain

| Meaning units                                                                               | Condensed meaning units                                                      | Codes                      | Categories                  | Themes                                        |
|---------------------------------------------------------------------------------------------|------------------------------------------------------------------------------|----------------------------|-----------------------------|-----------------------------------------------|
| <i>"Otherwise, I go for a walk with my kitten and puppy... it helps me to pain relief."</i> | Used to do something that distracts the feeling of pain<br>Engage in hobbies | Use of distraction methods | Medication and self-control | <b>Coping strategies for living with pain</b> |

|                                                                                                     |                                                                                                 |                                                    |                                            |  |
|-----------------------------------------------------------------------------------------------------|-------------------------------------------------------------------------------------------------|----------------------------------------------------|--------------------------------------------|--|
| <i>"I do not let others at home know that I am in pain. So I bear-up on tight somehow."</i>         | Used to tolerate pain by him/herself without letting the others know                            | Positive thinking                                  |                                            |  |
| <i>"I offer flowers, light, every morning and evening to Lord Buddha... it gives me happiness."</i> | Believe in religious rituals to relieve pain and to get mental satisfaction.<br>Praying/ hoping | Find ways of relaxation/ reduce the stress of life | Seeking spiritual support                  |  |
| <i>"I pray when I get unbearable pain or sadness. Then I feel a bit at ease."</i>                   | Believe in God/ Jesus in relieving pain                                                         | Seek God's support/ trust/hope                     |                                            |  |
| <i>"I did 'yanthra manthra adurukam' to get a relief. They gave kashaya"</i>                        | Believe in traditional customs native treatment                                                 | Seek the help of super-natural powers              |                                            |  |
| <i>"People in my workplace too helped me a lot... it is a great relief for me".</i>                 | Some people help the patients to cope with pain, share grievances, and pain relief.             | Positive social relationships                      | Receiving social support                   |  |
| <i>"I took 'Sinhala beheth from vedamahaththaya, not only these drugs."</i>                         | Patients try several home remedies and other alternative treatment methods for pain relief.     | Find pain-relieving methods                        | Exploring alternative treatments lifestyle |  |
| <i>"I adjusted the time of taking drugs a little bit."</i>                                          | They used to take medications given by the pain clinic,                                         | Taking medications as prescribed                   | Adapting daily life                        |  |

|                                                                                                                                 |                                                                                                                           |                                        |  |  |
|---------------------------------------------------------------------------------------------------------------------------------|---------------------------------------------------------------------------------------------------------------------------|----------------------------------------|--|--|
|                                                                                                                                 | timing adjusted to their lifestyle.                                                                                       | without any fail                       |  |  |
| <i>"I used to take two tablets of Paracetamol and go to sleep."</i>                                                             | Some patients have taken pain medications over the counter to control unbearable pain.                                    | Taking medications out of prescription |  |  |
| <i>"I used to do my work slowly when the pain goes.."</i><br><i>"Most of the time, I used to stay at home because of pain."</i> | Patients have adjusted the speed of daily activities within their limits. Practice life-style changes to escape from pain | Adjustments to daily chores            |  |  |
